# Supplementary material for: COVID-19: eine Chance zur Digitalisierung der Lehre?
Source: Springer Nature journal article supplement (doi:10.1007/s00101-021-01016-4), 2021-08-02
Supplement: MOESM1 [file 19533582]

Zusatzmaterial zum Beitrag

**COVID-19: Eine Chance zur Digitalisierung der Lehre? - Erfahrungsbericht und Ergebnisse einer Umfrage zur digitalen Lehre im Bereich Anästhesiologie, Intensiv-, Notfall-, Schmerz- und Palliativmedizin an der Universität Leipzig - Hempel G, Weissenbacher A, Stehr SN (2021) in *Der Anaesthesist*.**

Beitrag und Zusatzmaterial stehen Ihnen auf [www.springermedizin.de](http://www.springermedizin.de) zur Verfügung. Bitte geben Sie dort den Beitragstitel in die Suche ein.

The screenshot displays the student portal of the University of Leipzig, specifically the 'Downloads zu Vorlesungen / Lehrveranstaltungen' section for the 'Klinik für Anästhesiologie und Intensivtherapie'. The page features a navigation bar with 'Mein Studium', 'LernKlinik', 'E-Learning / Mediathek', and 'Mentoringprogramm'. A sidebar on the left lists various services like 'E-Learning / Blended Learning', 'Forum', 'Videokonferenzen', and 'Webkonferenzen'. The main content area is titled 'Downloads zu Vorlesungen / Lehrveranstaltungen' and includes a text block explaining the availability of lecture materials and a list of five downloadable resources, each with a PDF icon, a file size, and a 'Podcast' link. The resources are: 'Bedienung einer Perfusorspritze' (56 KB), 'Hygienische Händedesinfektion' (57 KB), 'Maskenbeatmung' (195 KB), 'Vorbereiten einer Kurzinfusion' (56 KB), and 'Basic Life Support' (78 KB). All refer to 'Team KAI' and the date '03.04.2020'. On the right side, there are sections for 'Login', 'LernKlinik Leipzig' (describing 14 training stations), 'Ansprechpartner', and 'Stundenpläne'.

Abbildung 1: Übersicht im Studierendenportal der Medizinischen Fakultät über die Bereitstellung der Lehrvideos der Klinik und Poliklinik für Anästhesiologie und Intensivtherapie (Ausschnitt)

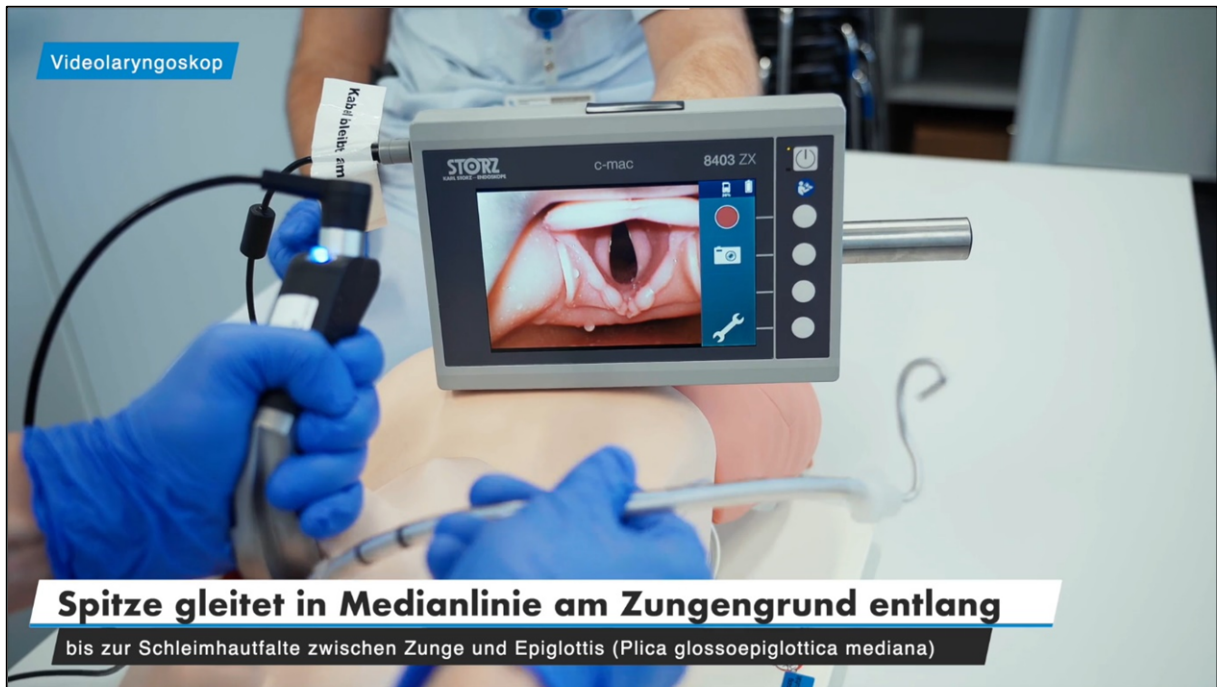

Abbildung 2: beispielhafter Screenshot eines Lehrvideos zur Durchführung der endotrachealen Intubation

| UNIVERSITÄT LEIPZIG Forum Universitätsmedizin Leipzig                                                                                   |    |        |                                                             |                 |
|-----------------------------------------------------------------------------------------------------------------------------------------|----|--------|-------------------------------------------------------------|-----------------|
| FORUM                                                                                                                                   |    | THEMEN | BEITRÄGE                                                    | LETZTER BEITRAG |
| Organisatorisches<br>Unterforum: StuRaMed                                                                                               | 54 | 510    | Re: Onlineklausur<br>von cg48xyty 03.02.2021, 11:21         |                 |
| FAQ<br>Liebe Studierenden, in diesem Forum archivieren wir gelöste Probleme, von denen wir denken, dass sie häufiger vorkommen könnten. | 3  | 9      | Podcast abspielen<br>von mf17demi 21.04.2021, 18:23         |                 |
| VORKLINIK                                                                                                                               |    | THEMEN | BEITRÄGE                                                    | LETZTER BEITRAG |
| Anatomie<br>Moderator: anatomie4                                                                                                        | 20 | 697    | Re: Fragen zur Vorlesung<br>von anatomie4 21.01.2021, 09:51 |                 |
| Biochemie                                                                                                                               | 16 | 38     | Podcast Genterapie<br>von jr16wary 03.02.2021, 09:42        |                 |

Abbildung 3: Ausschnitt der Forenübersicht des Forums der Medizinischen Fakultät für den Austausch zwischen Studierenden und Lehrenden

UNIVERSITÄT LEIPZIG **Forum Universitätsmedizin Leipzig**

Schnellzugriff  FAQ  Mod. Benachrichtigungen  Private Nachrichten  hempel

Foren-Übersicht < Klinik < QSB 08 - Notfallmedizin

### QSB 08 - Notfallmedizin

Neues Thema  Forum durchsuchen...

Themen als gelesen markieren • 16 Themen • Seite 1 von 1

| THEMEN                                                                                                                | ANTWORTEN | ZUGRIFFE | LETZTER BEITRAG                  |
|-----------------------------------------------------------------------------------------------------------------------|-----------|----------|----------------------------------|
| <b>Ergänzung zur Vorlesung Intoxikationen</b><br>von hempel » 29.01.2021, 16:15                                       | 1         | 91       | von med13ewp » 01.02.2021, 07:39 |
| <b>Aufzeichnung VL 16 Videos fehlen</b><br>von mh79lane » 22.01.2021, 15:17                                           | 1         | 81       | von hempel » 22.01.2021, 17:01   |
| <b>E Learning Fälle</b><br>von med13ewp » 16.01.2021, 16:48                                                           | 3         | 146      | von neef » 16.01.2021, 21:57     |
| <b>E Learning Fälle und Antworten</b><br>von med13ewp » 16.01.2021, 19:01                                             | 10        | 327      | von js20mume » 27.01.2021, 14:51 |
| <b>VL Organdysfunktion</b><br>von r166wive » 11.01.2021, 11:51                                                        | 2         | 106      | von r166wive » 11.01.2021, 14:11 |
| <b>VL Reanimation</b><br>von jv38hepe » 07.01.2021, 10:15                                                             | 2         | 113      | von jv38hepe » 08.01.2021, 10:34 |
| <b>Vorlesungsplan der interdisziplinären Vorlesungsreihe QSB 8 "Notfallmedizin"</b><br>von hempel » 31.12.2020, 19:25 | 8         | 408      | von hempel » 05.01.2021, 21:56   |
| <b>POL2</b><br>von jt92nijo » 13.12.2020, 21:29                                                                       | 6         | 432      | von hempel » 31.12.2020, 10:36   |

Abbildung 4: Beispielhafter Ausschnitt des Forums "QSB 8 - Notfallmedizin"

Thema / Titel: **Podcast 3 ALS Bausteine**  
Referent: XXXXXXXXXX

UNIVERSITÄT LEIPZIG

**Notfallsimulationskurs | QSB 8**

Quelle: <https://www.jama.com/2017/12/01/how-physicians-perform-prehospital-ecmo-on-the-streets-of-palo/>

## ERWÄGE





Quelle: <http://www.medscape.com/...>

77:52 / 47:55

Abbildung 5: Screenshot aus dem Podcast "Advanced Life Support (Teil 2)" zur Vorbereitung auf den digitalen Notfallsimulationskurs
